# Supplementary material
Source: PubMed Central journal article supplement (PMC9946940)
Supplement: 41467_2023_36637_MOESM2_ESM.pdf [file 41467_2023_36637_MOESM2_ESM.pdf]

### **Description of Additional Supplementary Files**

**Supplementary Data 1.** Predicted drugs for breast cancer PDX model. P-values were determined by two-sided K-S test and were adjusted by BH FDR.

**Supplementary Data 2.** Predicted drugs for leukemia. P-values were determined by two-sided K-S test and were adjusted by BH FDR.

**Supplementary Data 3.** Predicted drugs for COVID-19. P-values were determined by two-sided K-S test and were adjusted by BH FDR.

**Supplementary Data 4.** FDA-approved drugs and compounds used in advanced clinical trials or have been proven effective in animal models
